# Supplementary material for: Cardioprotective Effects of Palmitoleic Acid (C16:1n7) in a Mouse Model of Catecholamine-Induced Cardiac Damage Are Mediated by PPAR Activation
Source: Int J Mol Sci. 2021 Nov 24;22(23):12695. doi: 10.3390/ijms222312695 (PMC8657733; doi:10.3390/ijms222312695)
Supplement: Supplementary file 1 [file ijms-22-12695-s001.zip › Betz I et al., Table S1_RNseq Data over_100_R.xlsx]

## Sheet: Tabelle1
Table S1
35	36	41	42	43	44	FC_36o35	FC_42o41	FC_42o43	FC_44o41	FC_44o43	mgi_symbol	meanFC
9610	18553	5541	23094	6222	27459	1.93059	4.16784	3.71167	4.9556	4.41321	Angptl4	3.83578
691	1416	277	1023	477	1851	2.0492	3.69314	2.14465	6.68231	3.8805	Arc	3.68996
417	546	148	498	153	401	1.30935	3.36486	3.2549	2.70946	2.62092	Klf11	2.6519
2647	2647	1073	2630	782	2737	1	2.45107	3.36317	2.55079	3.5	Adm	2.57301
1912	2910	1144	2984	1237	3666	1.52197	2.60839	2.41229	3.20455	2.96362	Hilpda	2.54216
777	706	178	154	481	1325	0.908623	0.865169	0.320166	7.44382	2.75468	Tnf	2.45849
4117	3276	798	1596	386	1277	0.795725	2	4.13472	1.60025	3.30829	Hspa1b	2.3678
1309	1813	1799	3678	1964	6008	1.38503	2.04447	1.87271	3.33963	3.05906	Ucp3	2.34018
2316	3500	1879	3831	2782	7085	1.51123	2.03885	1.37707	3.77062	2.54673	Plin2	2.2489
2833	3193	1212	3313	1546	3302	1.12707	2.7335	2.14295	2.72442	2.13583	Myc	2.17276
263	309	453	995	241	527	1.1749	2.19647	4.12863	1.16336	2.18672	Chac1	2.17002
367	389	285	618	273	709	1.05995	2.16842	2.26374	2.48772	2.59707	Rasd2	2.11538
1316	1249	201	202	683	1276	0.949088	1.00498	0.295754	6.34826	1.86823	Ccl4	2.09326
25382	42770	26772	62780	31448	63451	1.68505	2.34499	1.99631	2.37005	2.01765	Txnip	2.08281
589	594	312	661	398	939	1.00849	2.11859	1.6608	3.00962	2.3593	1700017B05Rik	2.03136
4620	4053	2539	6066	2658	5818	0.877273	2.38913	2.28217	2.29145	2.18886	Gadd45b	1.98512
621	805	131	242	114	284	1.2963	1.84733	2.12281	2.16794	2.49123	Gdf15	1.95544
2123	1631	402	786	281	704	0.768252	1.95522	2.79715	1.75124	2.50534	Hspa1a	1.95326
589	685	169	390	244	469	1.16299	2.30769	1.59836	2.77515	1.92213	Map3k8	1.94816
180	127	1367	1390	203	207	0.705556	1.01683	6.84729	0.151426	1.0197	Nppa	1.84691
5537	5739	3775	8970	4077	7099	1.03648	2.37616	2.20015	1.88053	1.74123	Klf10	1.84185
377	304	208	251	217	630	0.806366	1.20673	1.15668	3.02885	2.90323	Rassf4	1.80739
87581	130735	102415	187585	138081	256028	1.49273	1.83162	1.35851	2.49991	1.85419	Pdk4	1.80639
497	424	674	897	272	688	0.853119	1.33086	3.29779	1.02077	2.52941	Sdf2l1	1.80381
13979	22284	6800	15728	12497	16840	1.59411	2.31294	1.25854	2.47647	1.34752	Rn18s-rs5	1.7947
842	748	431	776	391	858	0.888361	1.80046	1.98465	1.99072	2.19437	Fzd7	1.72416
2185	2108	2243	3060	1269	3145	0.96476	1.36424	2.41135	1.40214	2.47833	Pdia4	1.71586
1399	1550	901	1721	1308	2265	1.10793	1.9101	1.31575	2.51387	1.73165	Agpat9	1.69899
6270	5126	3482	6420	3277	6541	0.817544	1.84377	1.95911	1.87852	1.99603	Bcar1	1.69545
976	1203	238	532	407	556	1.23258	2.23529	1.30713	2.33613	1.36609	Gm23935	1.69199
258	251	255	471	309	575	0.972868	1.84706	1.52427	2.2549	1.86084	1200007C13Rik	1.67388
863	763	1053	1268	492	1242	0.884125	1.20418	2.57724	1.17949	2.52439	Creld2	1.668
252	247	201	431	201	307	0.980159	2.14428	2.14428	1.52736	1.52736	Sesn2	1.65815
5032	4401	2029	3309	2105	4353	0.874603	1.63085	1.57197	2.14539	2.06793	Slc2a1	1.6564
207	202	203	355	165	310	0.975845	1.74877	2.15152	1.52709	1.87879	Ankrd34a	1.65072
27329	28450	5815	11562	11043	15912	1.04102	1.98831	1.047	2.73637	1.44091	Hmox1	1.64478
8354	7469	4644	9141	4789	8063	0.894063	1.96835	1.90875	1.73622	1.68365	Pim3	1.63276
516	418	274	473	334	629	0.810078	1.72628	1.41617	2.29562	1.88323	Proser2	1.62361
748	1176	307	640	534	636	1.57219	2.08469	1.1985	2.07166	1.19101	Mir6236	1.61953
1112	737	163	200	126	327	0.66277	1.22699	1.5873	2.00613	2.59524	Gm26917	1.60156
12004	12599	4804	7731	10037	14876	1.04957	1.60928	0.77025	3.09659	1.48212	Serpine1	1.59688
1551	1678	990	1709	965	1663	1.08188	1.72626	1.77098	1.6798	1.72332	Lipe	1.59319
6909	4536	2209	4637	1916	2816	0.656535	2.09914	2.42015	1.27478	1.46973	Gadd45g	1.57488
856	719	427	581	829	1394	0.839953	1.36066	0.700844	3.26464	1.68154	Hsd17b11	1.56867
1875	2352	1488	2620	1695	2587	1.2544	1.76075	1.54572	1.73858	1.52625	Asb4	1.5637
306	265	299	350	236	567	0.866013	1.17057	1.48305	1.89632	2.40254	Itpk1	1.5622
16215	12647	7055	12966	7989	13282	0.779957	1.83785	1.62298	1.88264	1.66254	Ier3	1.55679
1311	1143	1595	2101	845	1717	0.871854	1.31724	2.48639	1.07649	2.03195	Ddit3	1.55501
3253	2754	2134	3762	1703	2784	0.846603	1.76289	2.20904	1.30459	1.63476	8430408G22Rik	1.54941
478	381	147	303	187	269	0.797071	2.06122	1.62032	1.82993	1.4385	Phf13	1.54901
1534	1722	1896	2823	1646	3012	1.12256	1.48892	1.71507	1.58861	1.82989	Slc25a22	1.54874
1974	2015	2817	3669	1774	3649	1.02077	1.30245	2.06821	1.29535	2.05693	Manf	1.54394
202	174	234	354	248	470	0.861386	1.51282	1.42742	2.00855	1.89516	Adamts15	1.54014
317	277	190	289	192	361	0.873817	1.52105	1.50521	1.9	1.88021	Fzd1	1.53186
5379	4301	1770	3641	1985	2763	0.799591	2.05706	1.83426	1.56102	1.39194	Csrnp1	1.52659
213	264	248	321	269	504	1.23944	1.29435	1.19331	2.03226	1.87361	Clp1	1.52602
10996	8005	2130	4152	2104	3113	0.727992	1.9493	1.97338	1.4615	1.47956	Zfp36	1.51779
3268	2781	1448	2408	1261	2083	0.850979	1.66298	1.9096	1.43854	1.65186	Elmsan1	0.659834
746	488	377	191	661	444	0.654155	0.506631	0.288956	1.17772	0.67171	Icosl	0.65978
499	311	249	144	311	226	0.623246	0.578313	0.463023	0.907631	0.726688	Micall2	0.659494
238	172	277	164	320	217	0.722689	0.592058	0.5125	0.783394	0.678125	Pigm	0.656878
2211	1323	1508	934	1866	1305	0.598372	0.619363	0.500536	0.865385	0.699357	Ppp1r9b	0.656385
378	284	740	411	584	415	0.751323	0.555405	0.703767	0.560811	0.710616	Scai	0.656172
809	502	259	180	603	302	0.620519	0.694981	0.298507	1.16602	0.500829	Acsl5	0.655766
8692	5549	15088	5757	6557	6272	0.638403	0.381562	0.877993	0.415695	0.956535	Malat1	0.653475
313	195	400	229	511	364	0.623003	0.5725	0.448141	0.91	0.712329	Polr3f	0.653184
502	356	171	109	345	183	0.709163	0.637427	0.315942	1.07018	0.530435	Kcnj8	0.652474
1158	742	1778	1118	1729	1179	0.64076	0.628796	0.646617	0.663105	0.681897	Auts2	0.652008
212	136	377	243	460	299	0.641509	0.644562	0.528261	0.793103	0.65	Syt12	0.651412
5750	3861	2501	1572	4243	2491	0.671478	0.628549	0.370493	0.996002	0.587085	Eng	0.6502
763	508	284	189	848	361	0.665793	0.665493	0.222877	1.27113	0.425708	Entpd1	0.649826
737	524	696	429	772	500	0.710991	0.616379	0.555699	0.718391	0.647668	Tnk2	0.649512
373	244	385	270	384	223	0.654155	0.701299	0.703125	0.579221	0.580729	Zfp30	0.643485
1230	797	1068	674	1262	812	0.647967	0.631086	0.534073	0.7603	0.643423	Zswim4	0.643295
996	642	533	329	811	498	0.644578	0.617261	0.405672	0.934334	0.614057	Tle3	0.642498
303	239	540	360	551	301	0.788779	0.666667	0.653358	0.557407	0.546279	2610008E11Rik	0.641945
409	274	884	527	670	441	0.669927	0.596154	0.786567	0.498869	0.658209	Foxo6os	0.639614
880	632	1370	892	1598	923	0.718182	0.651095	0.558198	0.673723	0.577597	Slc45a4	0.634195
195	158	254	144	226	137	0.810256	0.566929	0.637168	0.53937	0.606195	Prdm15	0.631182
4324	2905	10227	4679	7721	6228	0.671832	0.457514	0.60601	0.608976	0.806631	Cenpa	0.630023
1931	1305	531	316	1670	676	0.675816	0.595104	0.189222	1.27307	0.40479	Vcam1	0.627417
1166	825	587	338	772	470	0.707547	0.575809	0.437824	0.800681	0.608808	Trim56	0.625857
763	500	439	319	618	316	0.655308	0.726651	0.516181	0.719818	0.511327	Tspan18	0.62542
801	552	972	533	834	561	0.689139	0.548354	0.639089	0.57716	0.672662	Fhod1	0.624012
632	403	1263	634	816	589	0.637658	0.501979	0.776961	0.46635	0.721814	Ptprf	0.620523
253	184	485	231	334	238	0.727273	0.476289	0.691617	0.490722	0.712575	Snapc4	0.619425
2273	1325	737	408	1543	846	0.58293	0.553596	0.26442	1.1479	0.548283	Parp14	0.619353
313	212	155	100	282	142	0.677316	0.645161	0.35461	0.916129	0.503546	Ttyh2	0.619263
848	566	315	168	352	235	0.667453	0.533333	0.477273	0.746032	0.667614	Gbp9	0.618282
9883	7345	5263	3015	11788	5529	0.743195	0.572867	0.255769	1.05054	0.469036	Csf1	0.617956
534	321	391	272	416	228	0.601124	0.695652	0.653846	0.58312	0.548077	Bahcc1	0.61534
1080	744	1083	642	1477	850	0.688889	0.592798	0.434665	0.784857	0.575491	Hivep3	0.615189
4098	3174	2162	1066	2586	1644	0.774524	0.493062	0.41222	0.760407	0.635731	Flnb	0.614893
749	430	229	142	459	240	0.574099	0.620087	0.309368	1.04803	0.522876	Hic1	0.614295
205	150	489	282	422	248	0.731707	0.576687	0.668246	0.507157	0.587678	Pirt	0.61317
222	131	184	128	232	126	0.59009	0.695652	0.551724	0.684783	0.543103	Trim12c	0.61296
708	601	1905	784	2160	1445	0.84887	0.411549	0.362963	0.75853	0.668981	Mir22hg	0.609955
244	165	317	157	381	252	0.67623	0.495268	0.412073	0.794953	0.661417	Ercc6	0.60741
2333	1792	943	504	2039	959	0.76811	0.534464	0.24718	1.01697	0.470329	Neurl3	0.606742
271	208	202	117	251	136	0.767528	0.579208	0.466135	0.673267	0.541833	Epb41l1	0.605438
1492	1041	1536	841	1477	913	0.697721	0.547526	0.569397	0.594401	0.618145	Ubash3b	0.604903
243	205	731	284	489	355	0.843621	0.388509	0.580777	0.485636	0.725971	Lrp8	0.604568
859	562	1226	668	1268	804	0.654249	0.544861	0.526814	0.655791	0.634069	Rfwd3	0.602823
321	157	161	110	207	117	0.489097	0.68323	0.531401	0.726708	0.565217	Sipa1l3	0.596841
518	348	259	132	407	234	0.671815	0.509653	0.324324	0.903475	0.574939	Sh3tc1	0.596641
1382	847	2459	1468	2308	1354	0.61288	0.596991	0.636049	0.55063	0.586655	Rgma	0.595834
4965	3035	2019	1199	3022	1667	0.611279	0.593858	0.396757	0.825656	0.551621	Rnf213	0.594851
776	595	1086	523	983	616	0.766753	0.481584	0.532045	0.567219	0.626653	Il15ra	0.594543
1740	1154	776	405	960	564	0.663218	0.521907	0.421875	0.726804	0.5875	Nav1	0.58417
761	459	272	152	389	219	0.603154	0.558824	0.390746	0.805147	0.562982	C130074G19Rik	0.583709
380	244	258	123	439	246	0.642105	0.476744	0.280182	0.953488	0.560364	Map3k6	0.58247
910	629	2046	999	1635	1005	0.691209	0.48827	0.611009	0.491202	0.614679	Asap3	0.578427
2592	1897	1378	659	1704	982	0.731867	0.478229	0.386737	0.712627	0.576291	Arap3	0.576623
359	260	1012	451	916	587	0.724234	0.445652	0.492358	0.58004	0.64083	Zfp52	0.574901
662	396	209	125	317	161	0.598187	0.598086	0.394322	0.770335	0.507886	Oasl2	0.572881
1978	1388	2765	1390	5701	2526	0.701719	0.502712	0.243817	0.913562	0.44308	Arhgap32	0.556188
797	495	309	155	441	237	0.621079	0.501618	0.351474	0.76699	0.537415	Kif26a	0.555556
989	506	255	168	798	268	0.511628	0.658824	0.210526	1.05098	0.33584	Gbp2	0.552845
364	197	395	136	284	222	0.541209	0.344304	0.478873	0.562025	0.78169	Nlrc5	0.539985
960	523	406	198	610	309	0.544792	0.487685	0.32459	0.761084	0.506557	Nos3	0.522054
761	521	1299	656	1665	745	0.684625	0.505004	0.393994	0.573518	0.447447	Irs1	0.509432
619	380	1151	575	1413	635	0.613893	0.499566	0.406936	0.551694	0.449398	Ntn4	0.501956
3217	2157	7302	2226	4597	2786	0.6705	0.304848	0.484229	0.381539	0.606047	Neat1	0.489383
345	209	575	277	578	246	0.605797	0.481739	0.479239	0.427826	0.425606	Thbs4	0.478964
214	178	986	331	813	361	0.831776	0.3357	0.407134	0.366126	0.444034	Galnt16	0.467707
725	417	310	126	958	287	0.575172	0.406452	0.131524	0.925806	0.299582	Tnfsf10	0.464328
812	430	253	108	620	214	0.529557	0.426877	0.174194	0.84585	0.345161	Gbp3	0.463908
1513	982	771	266	1449	543	0.649042	0.345006	0.183575	0.70428	0.374741	Atp2b4	0.441971
413	302	479	128	335	130	0.731235	0.267223	0.38209	0.271399	0.38806	Prkcg	0.407788
